# Supplementary figures and images for: Synthesis of novel molecular probes inspired by harringtonolide
Source: Royal Society of Chemistry journal article supplement (doi:10.1039/c1ob05299c), 2011-01-01

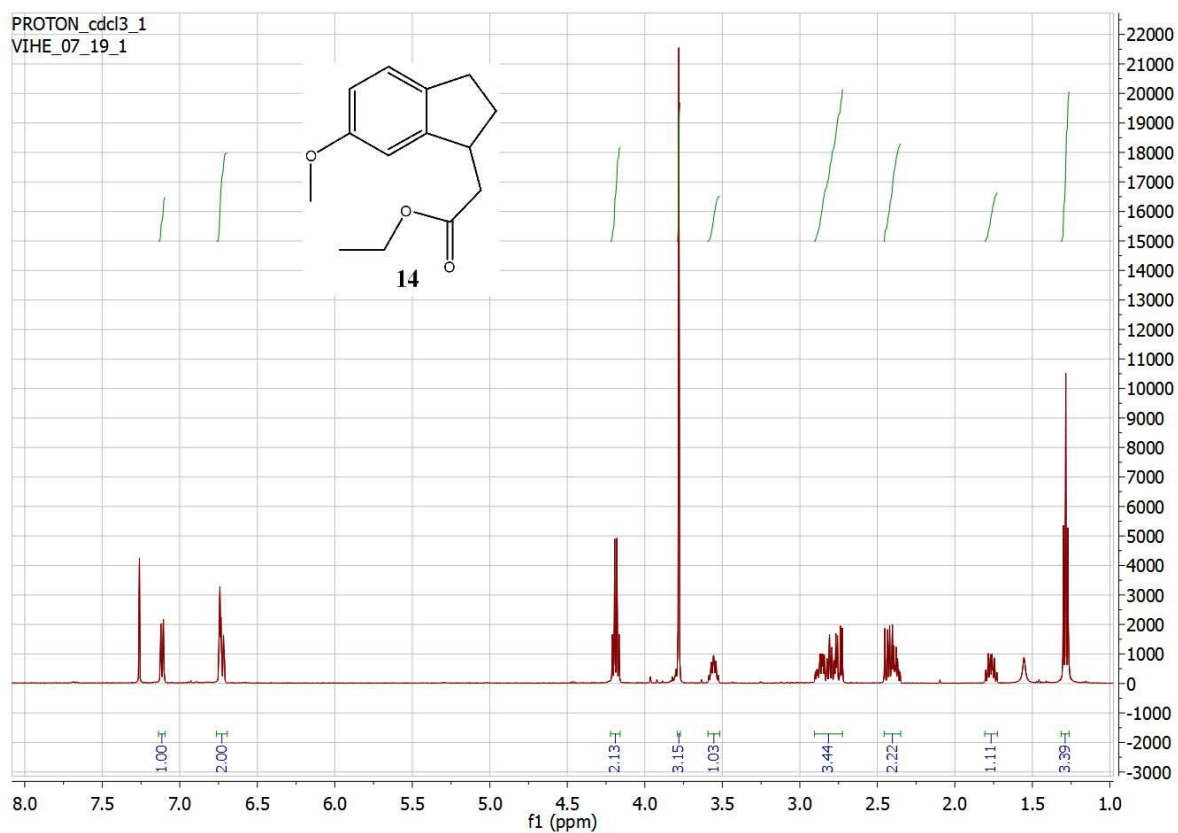

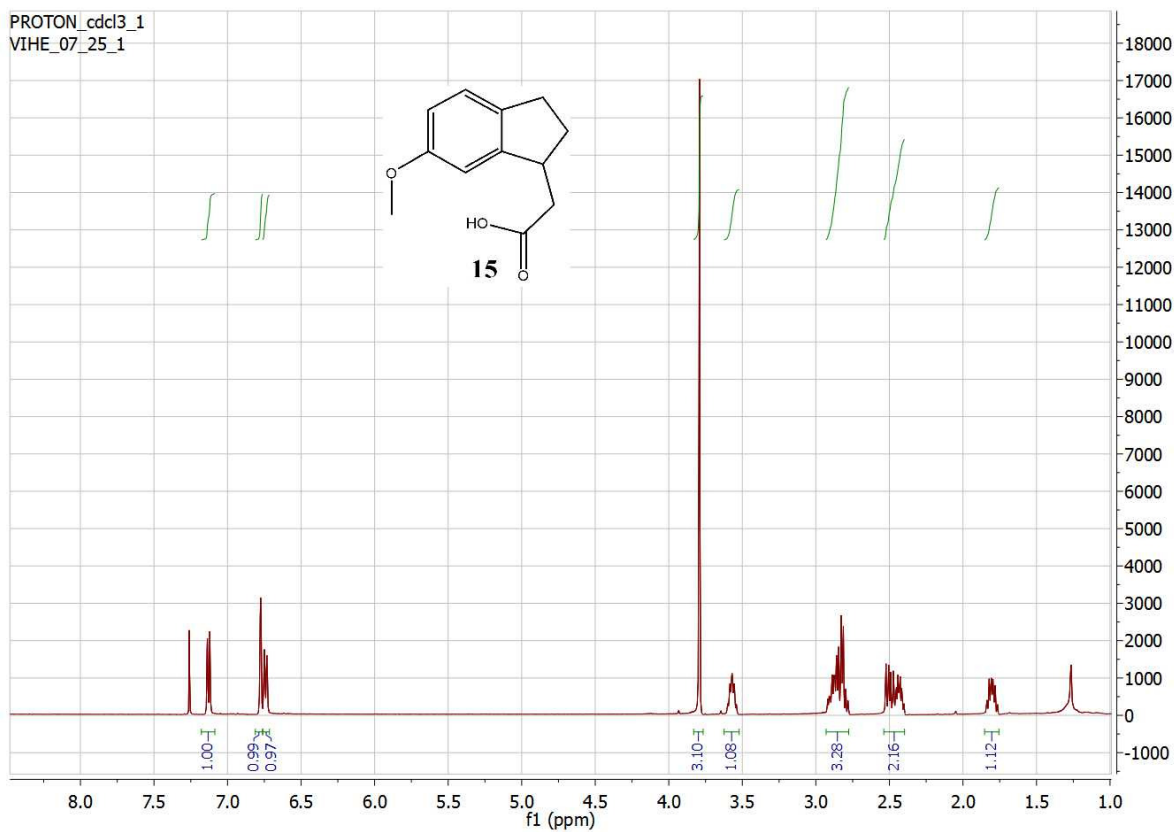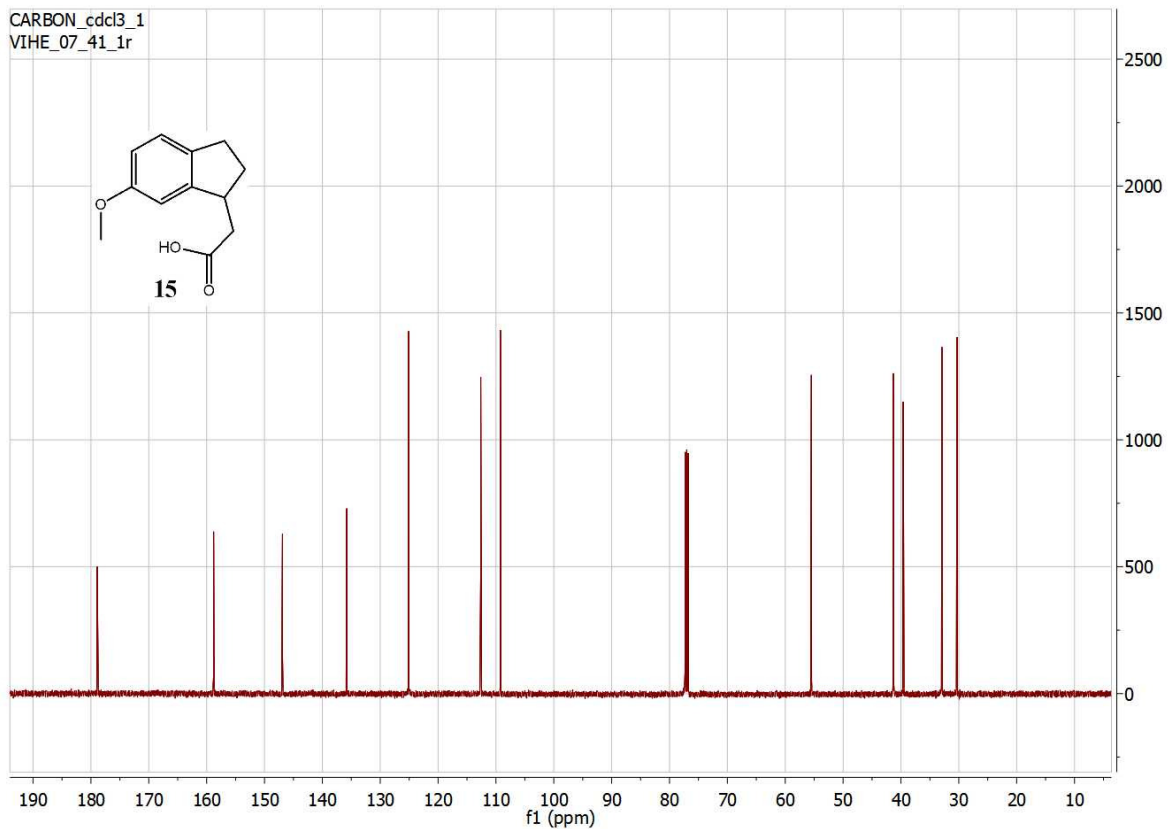

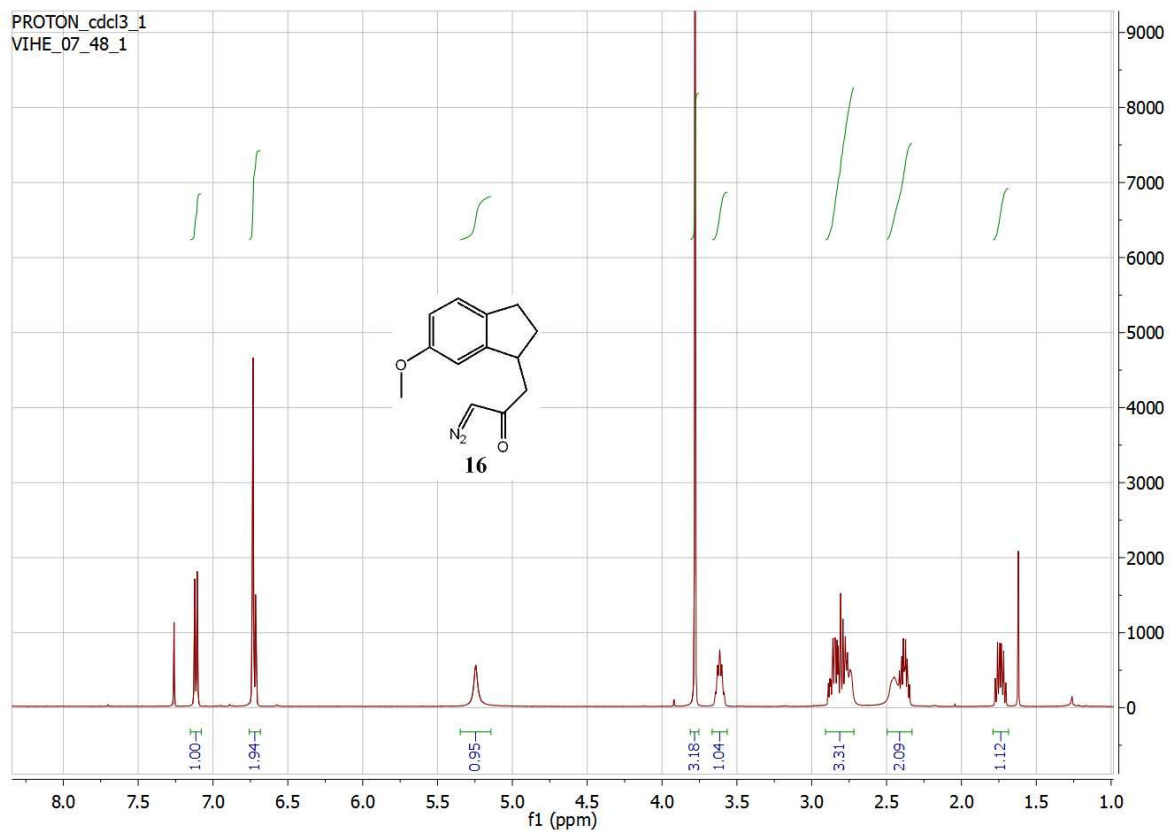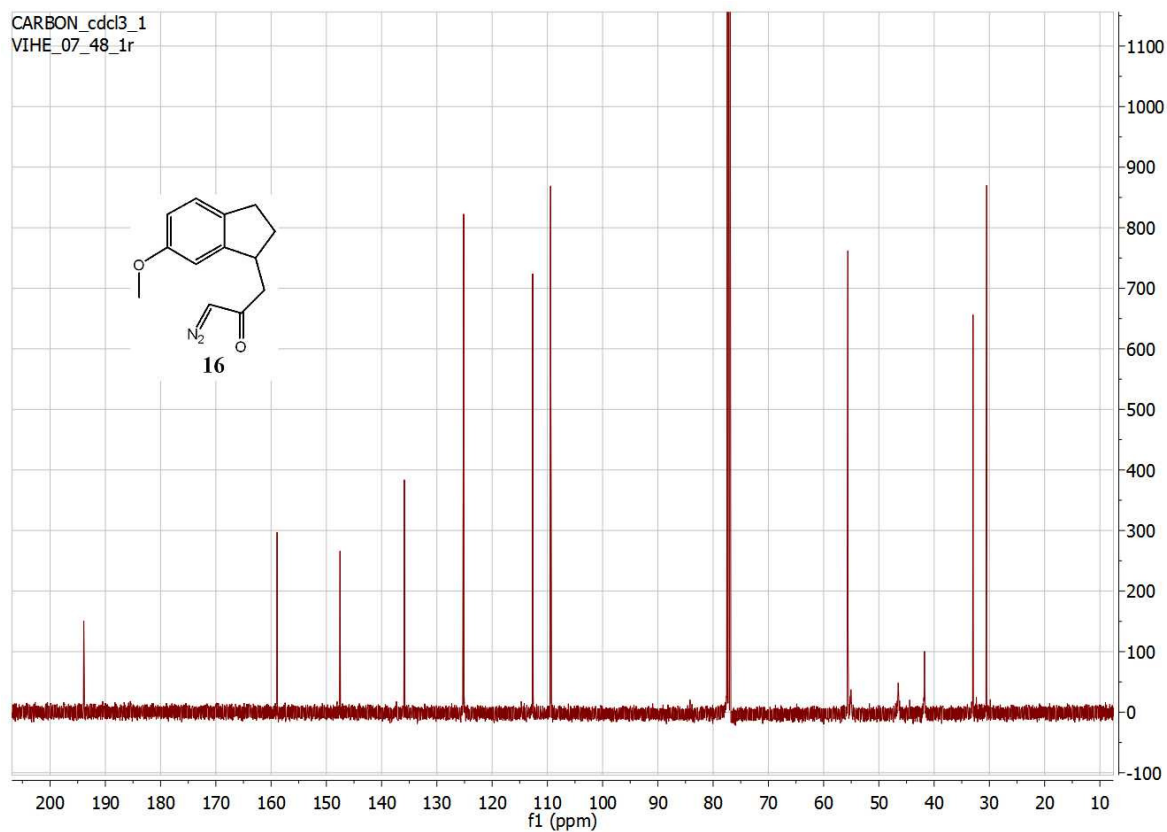

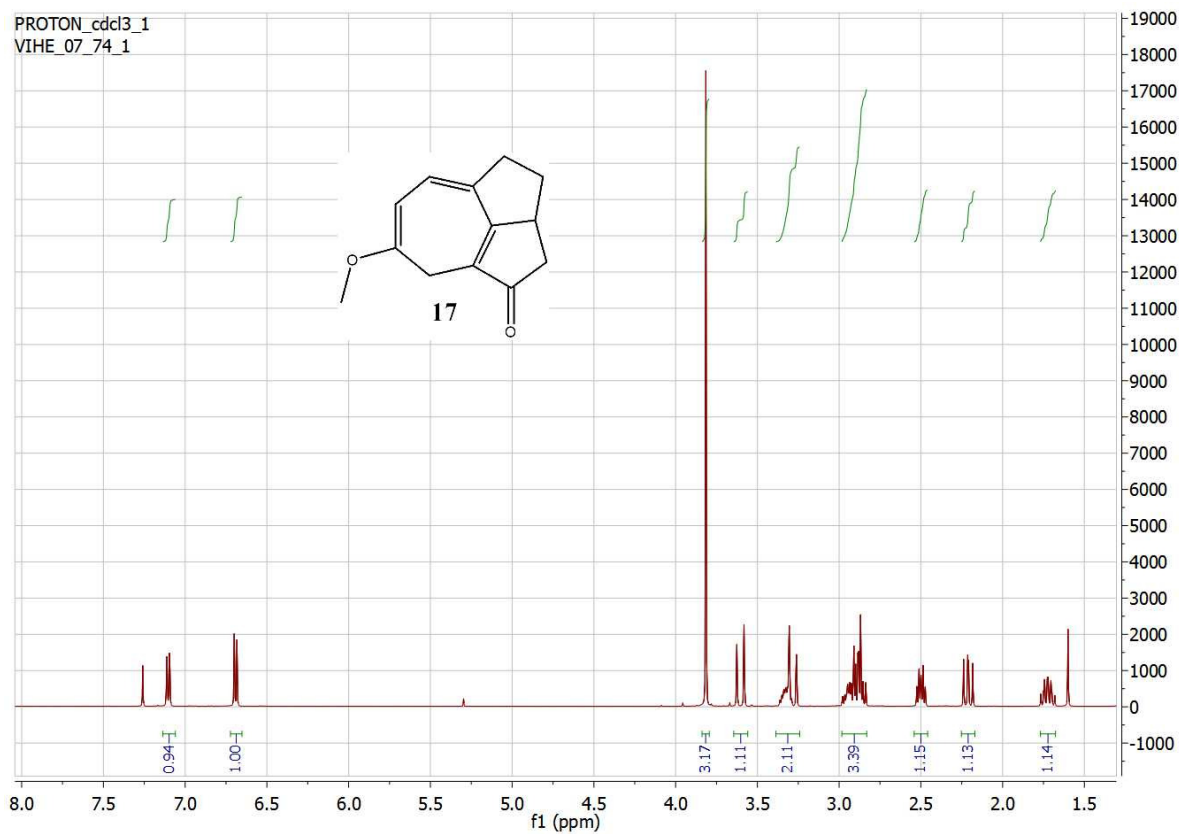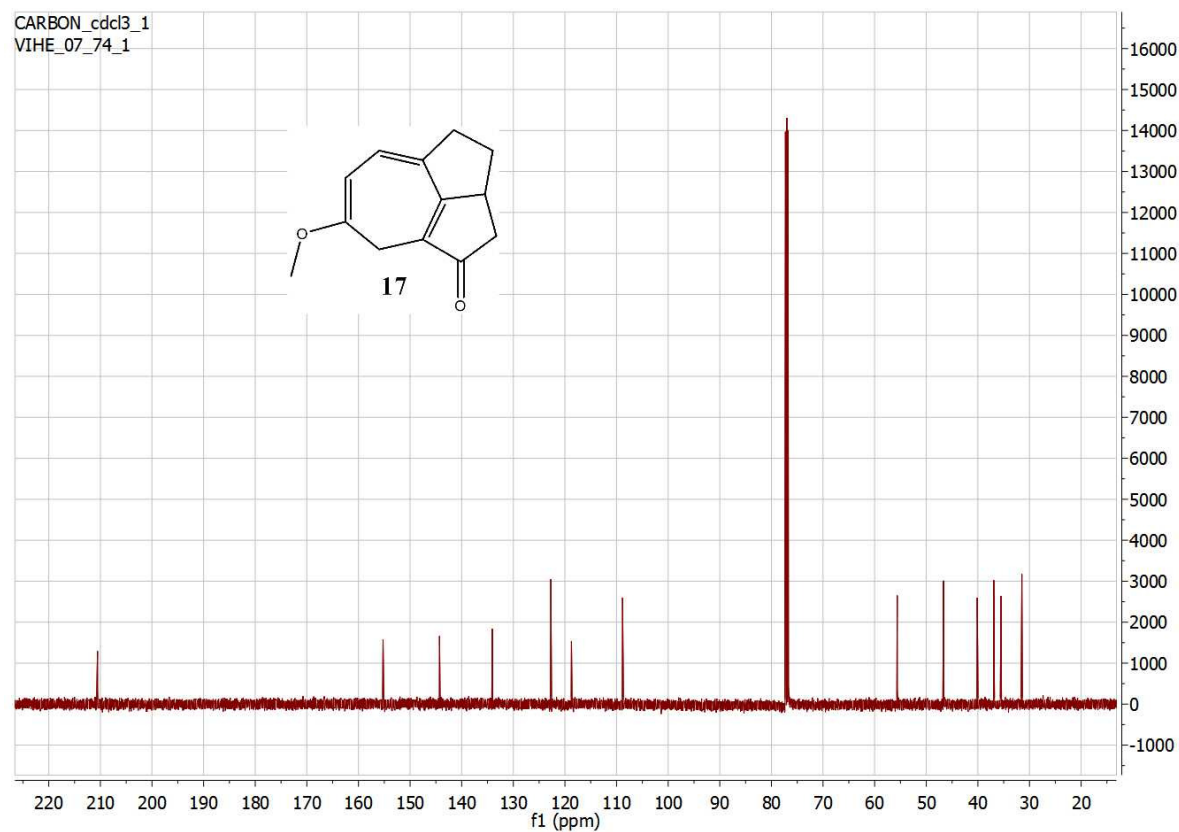

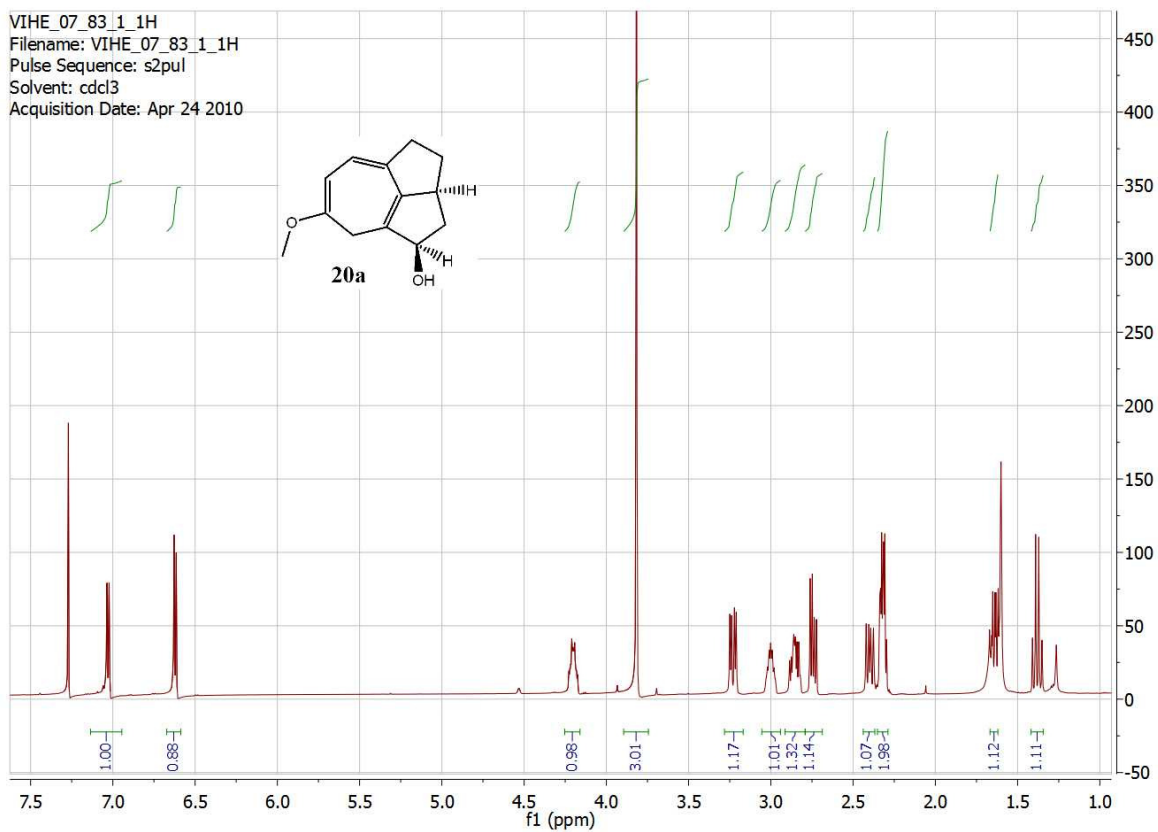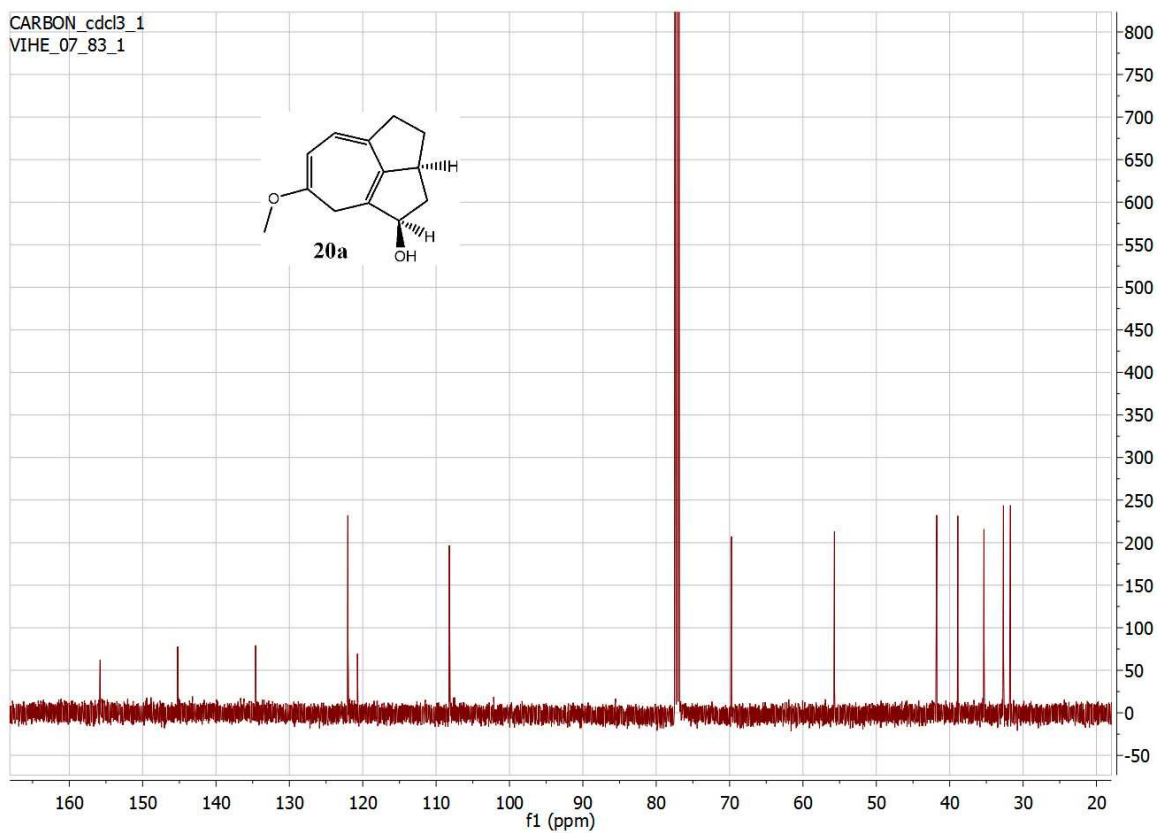

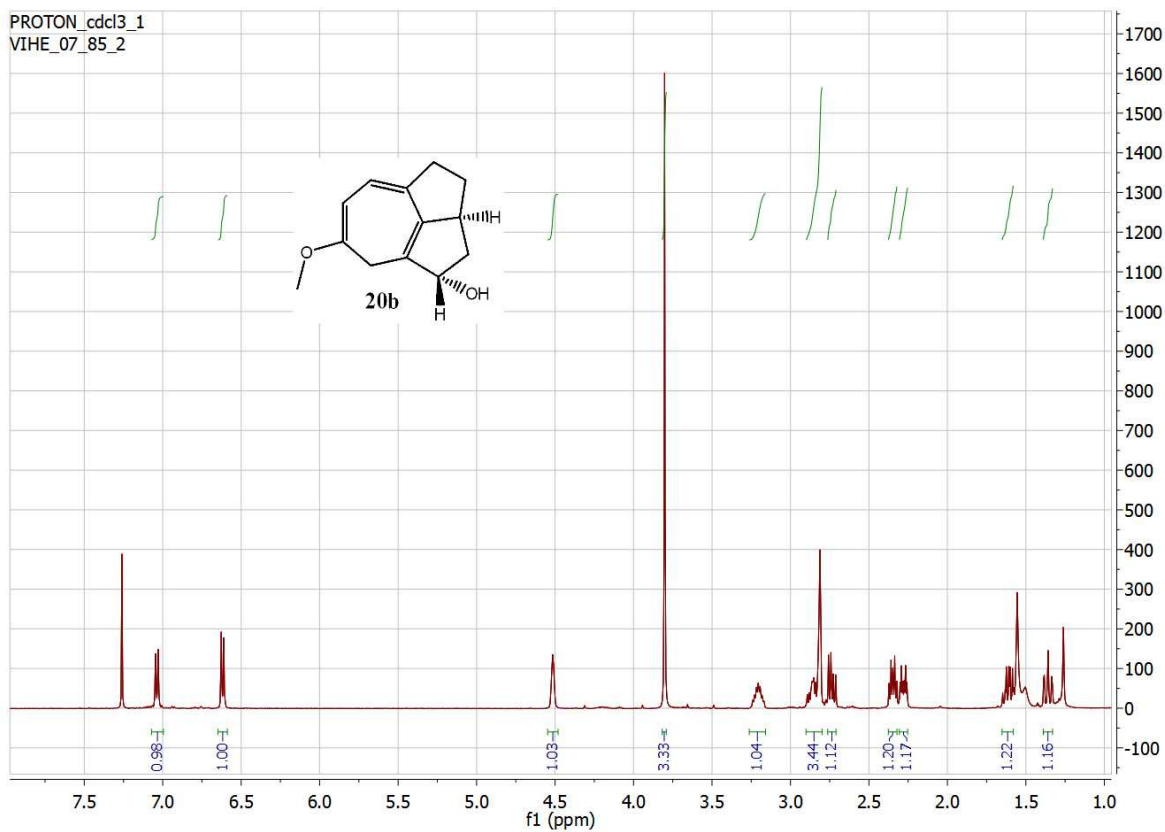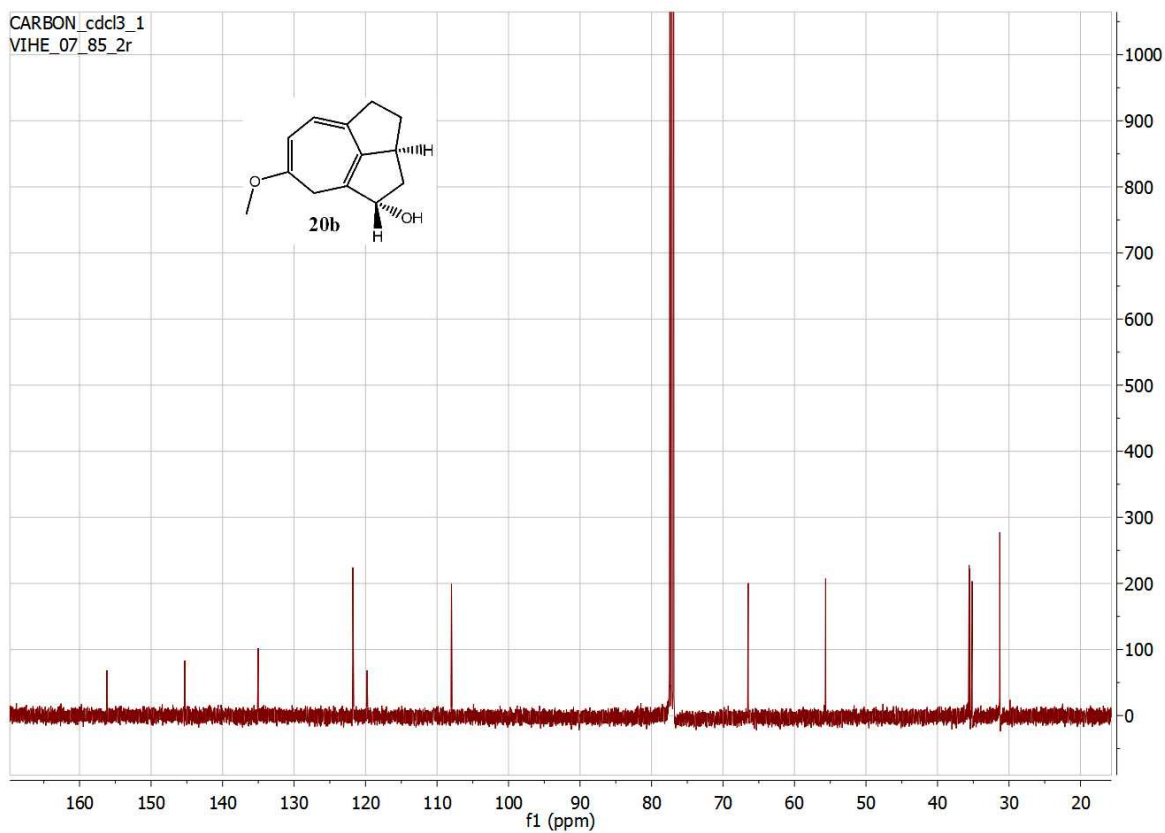

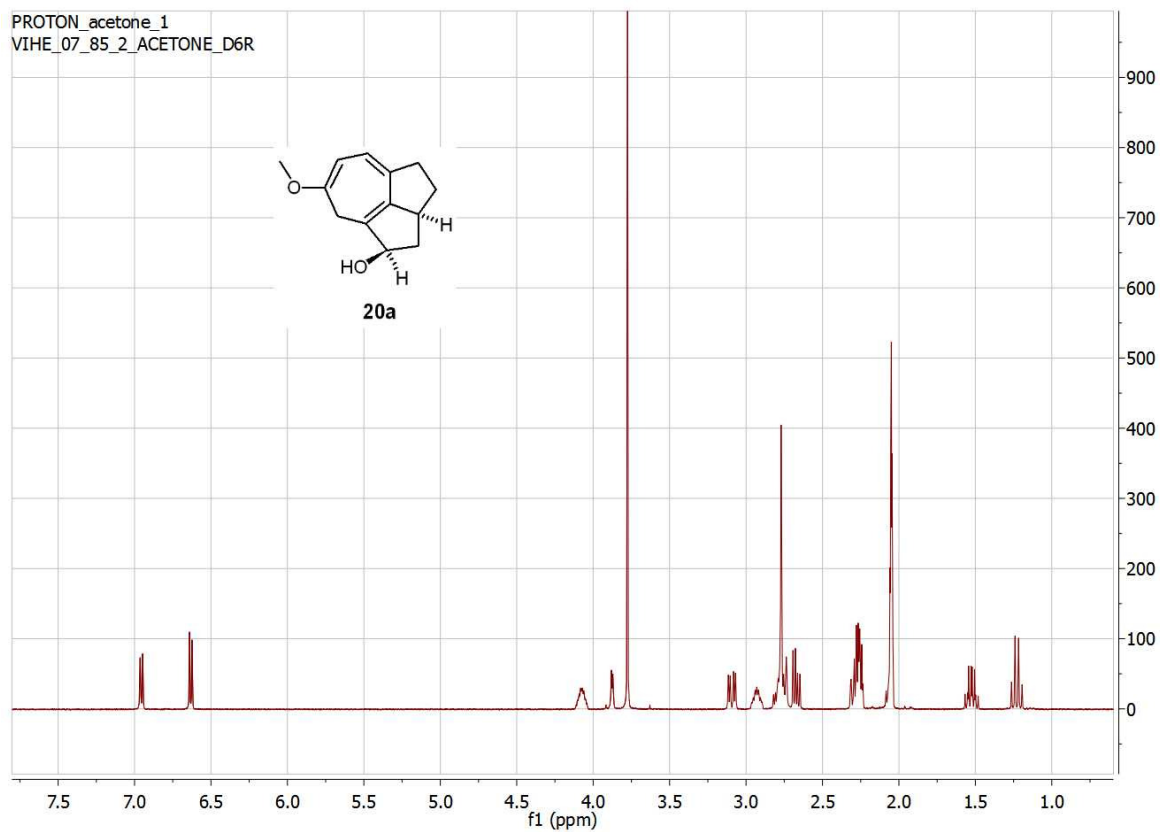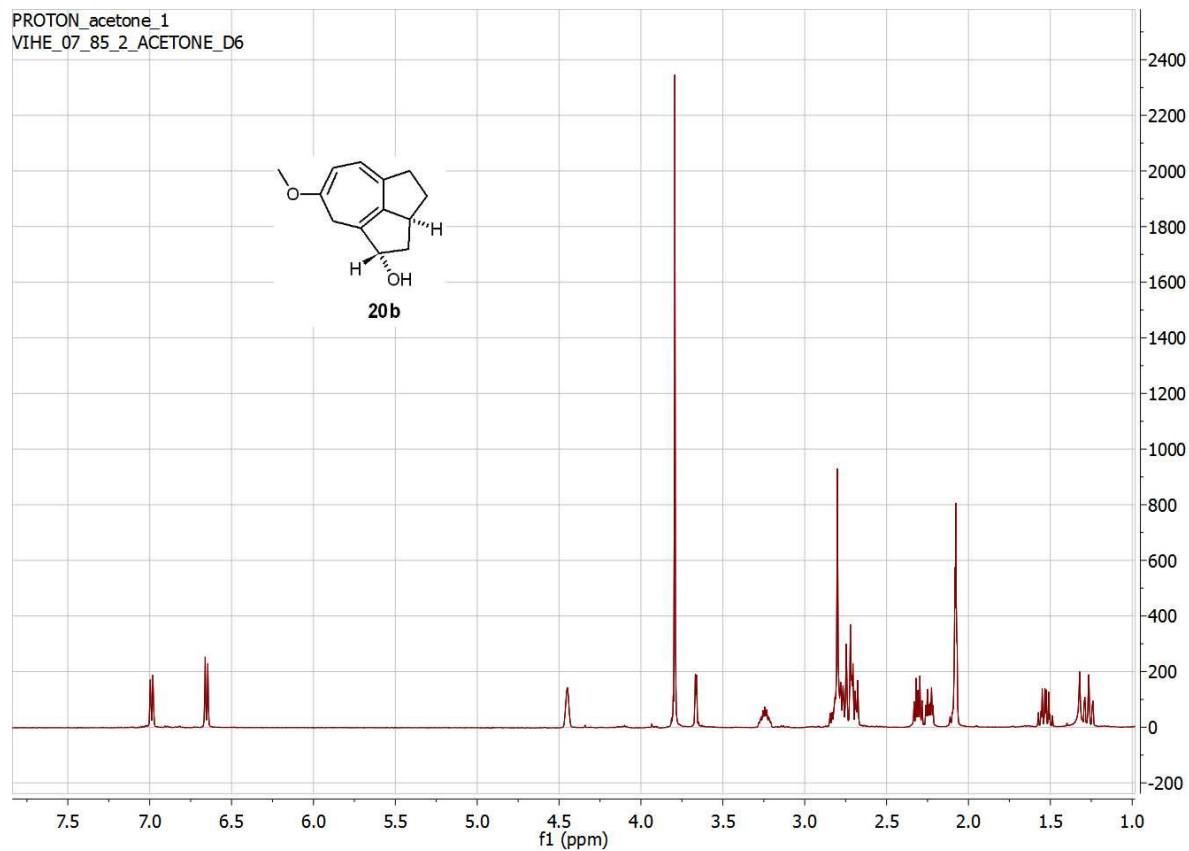

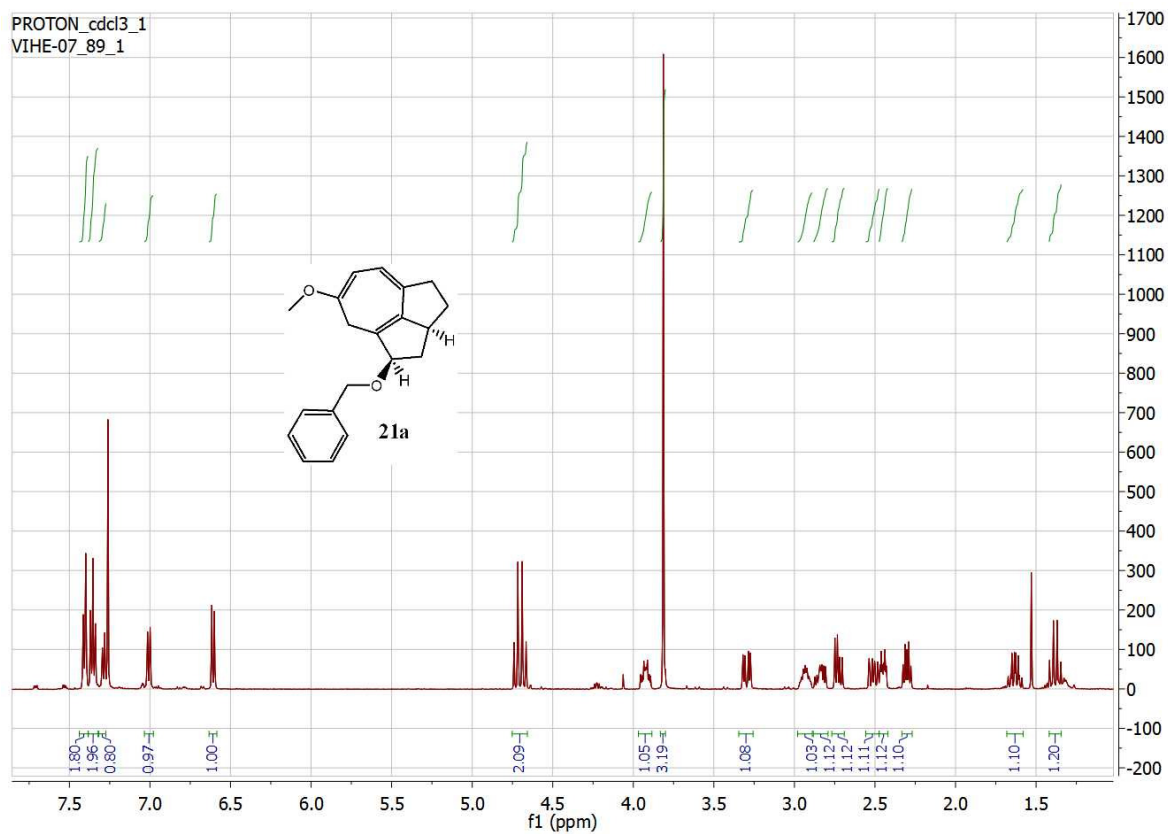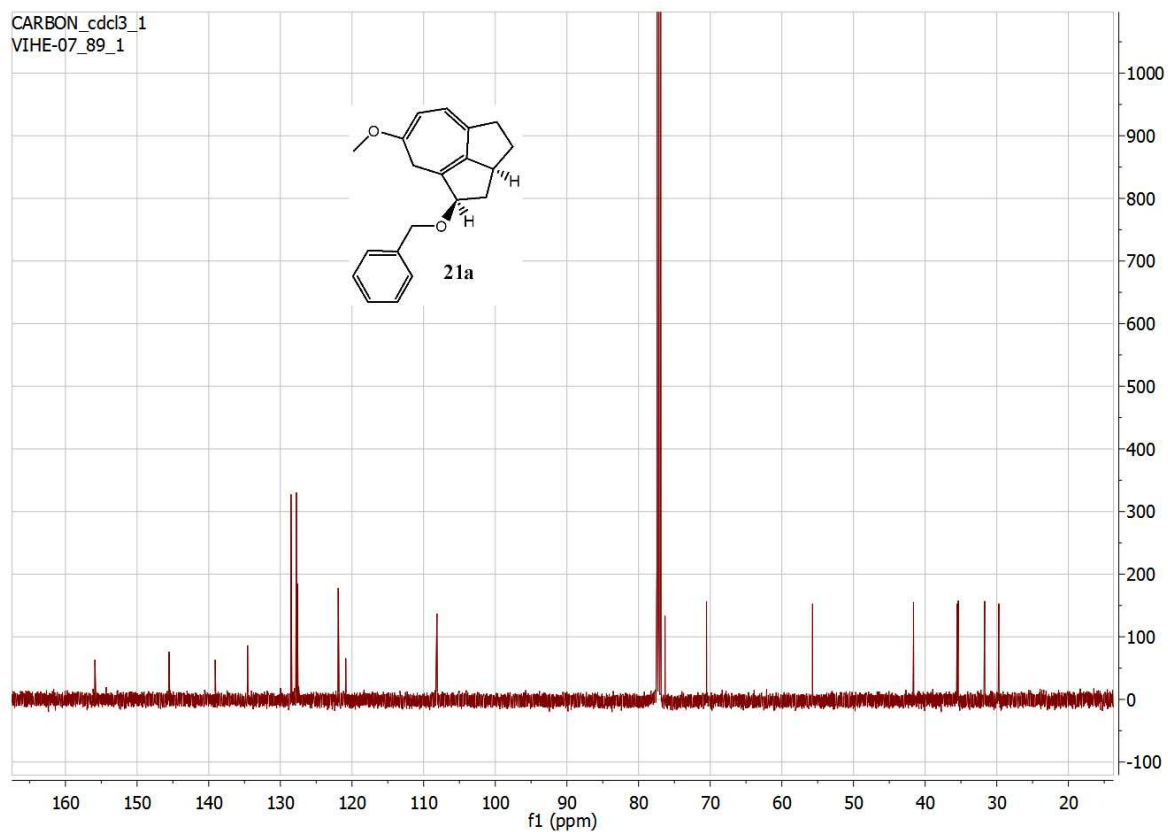



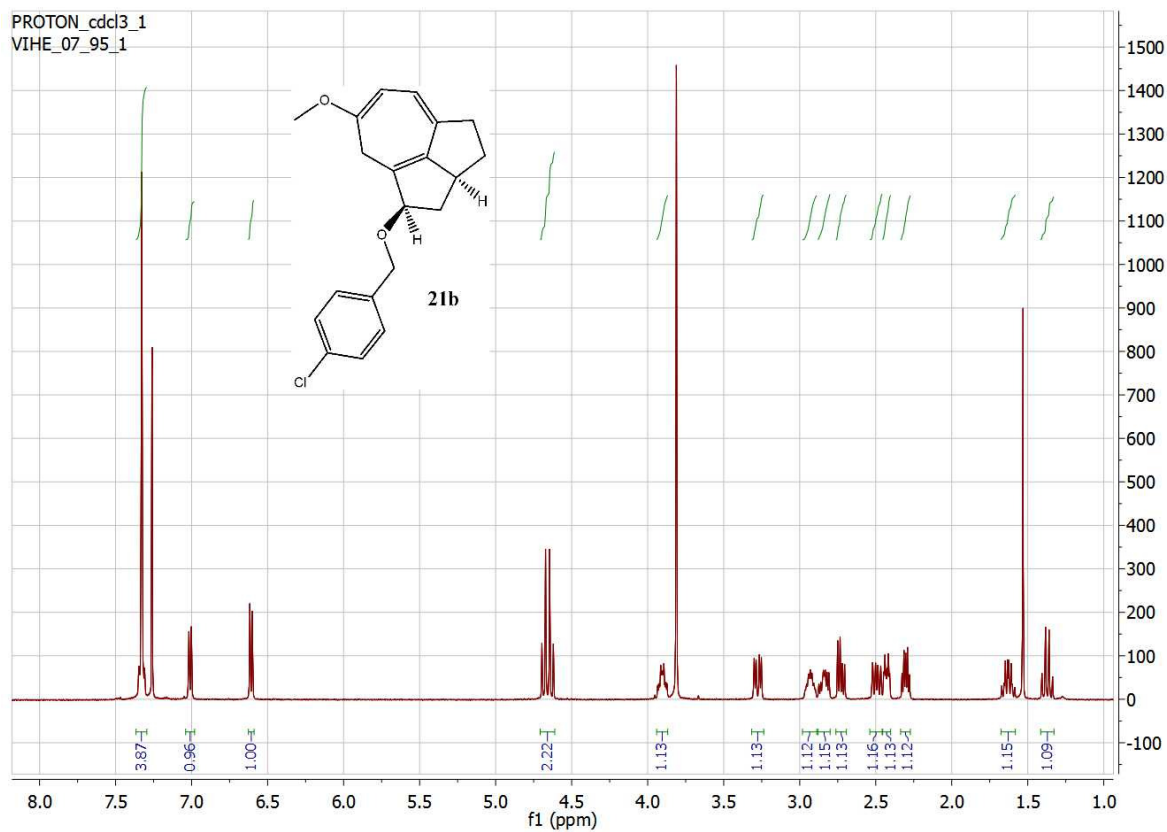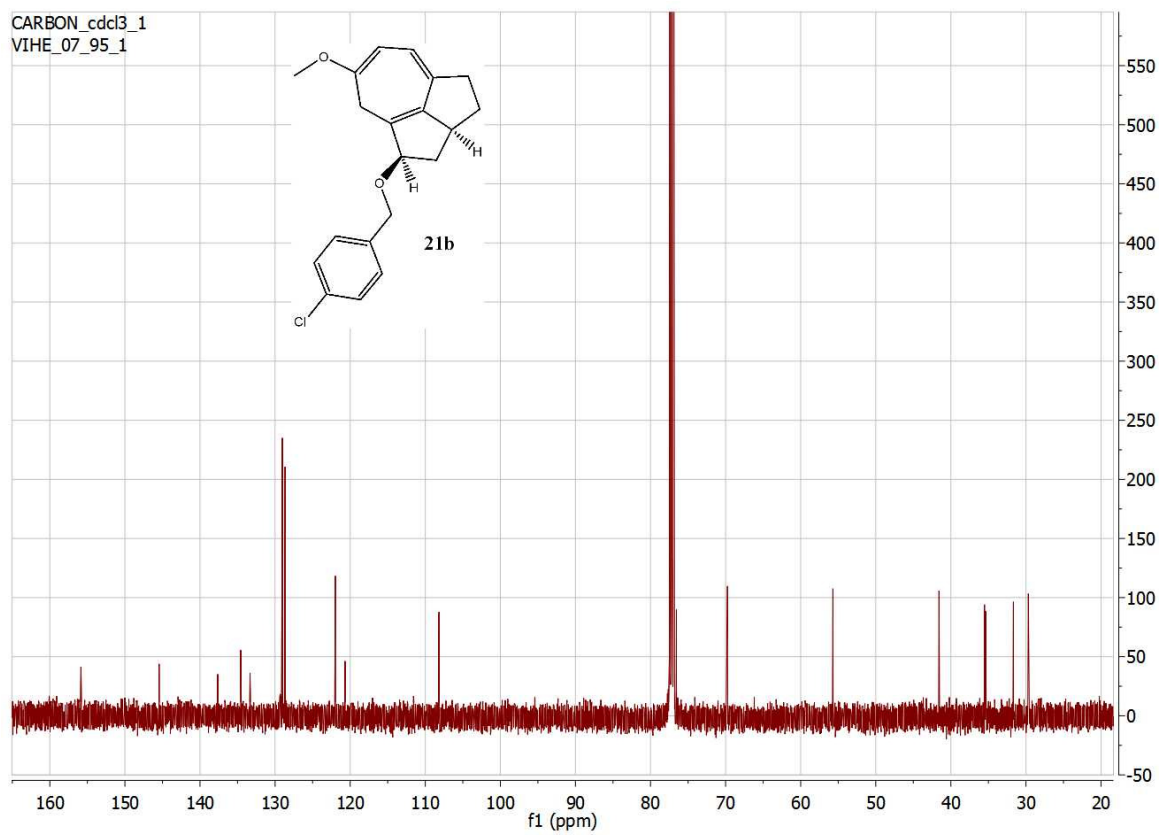

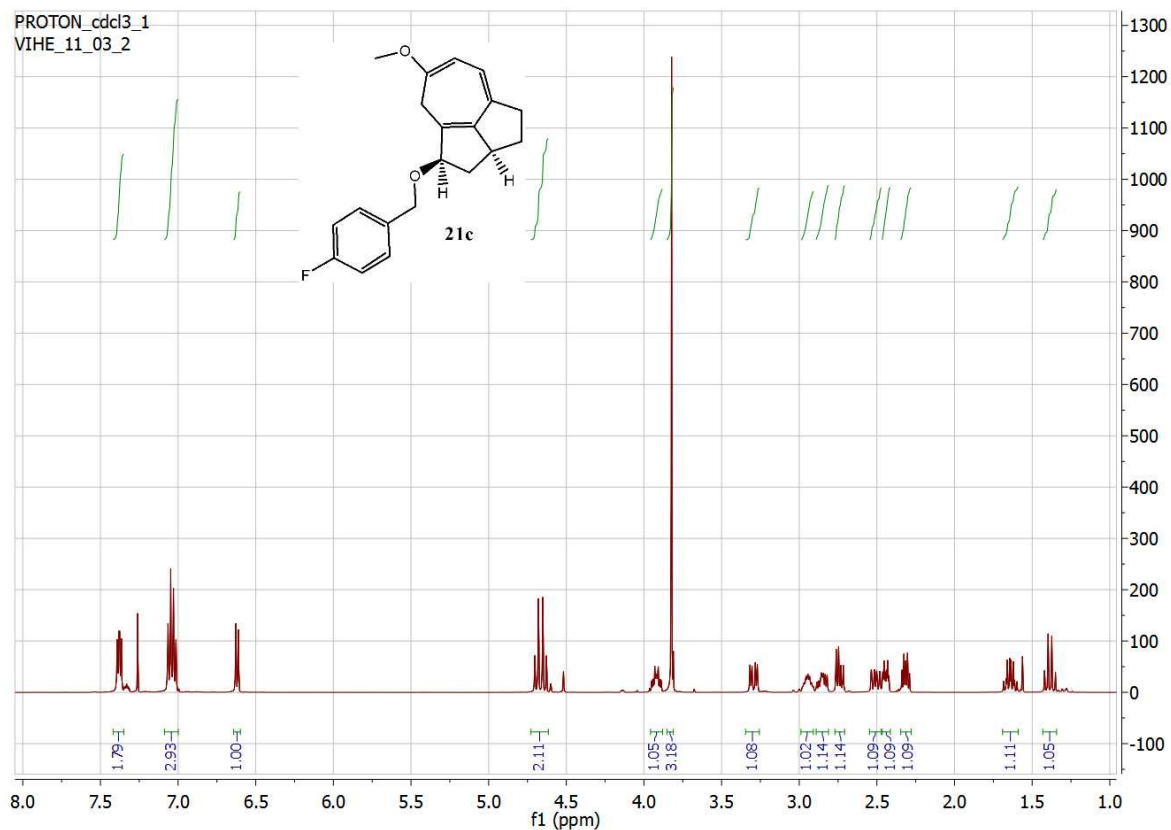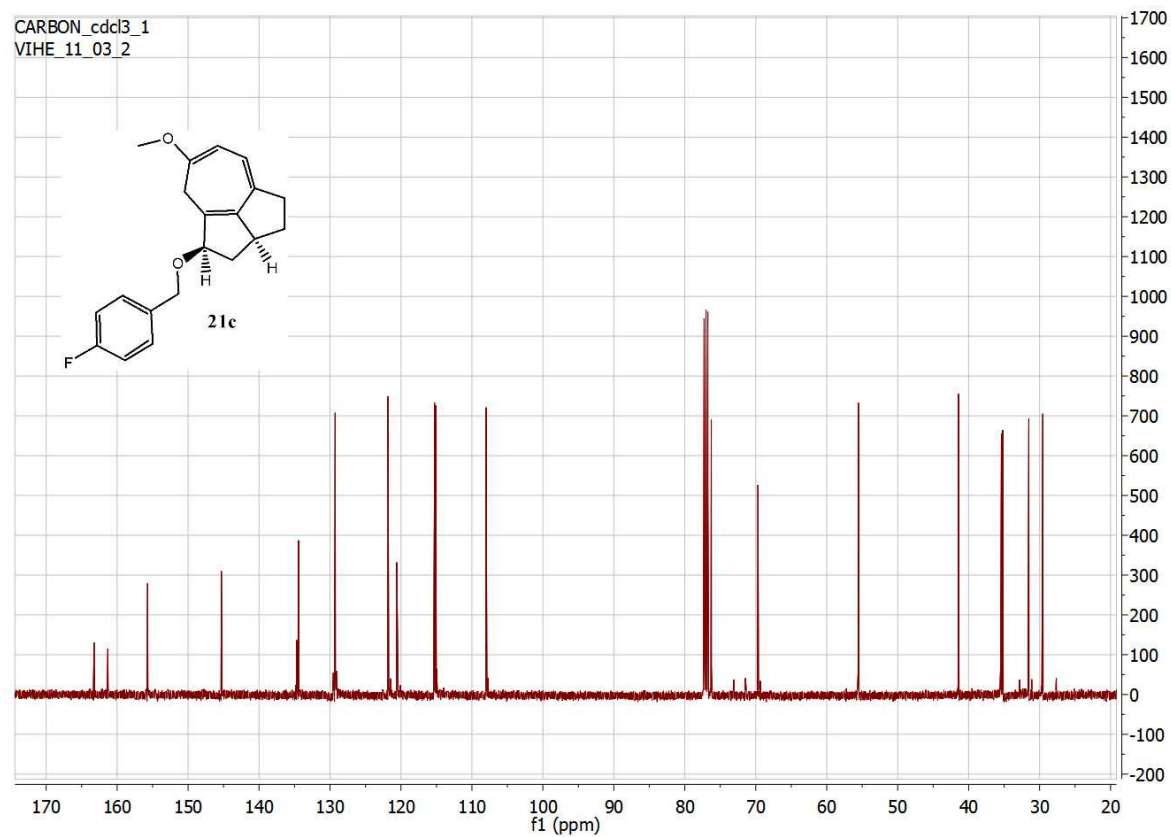

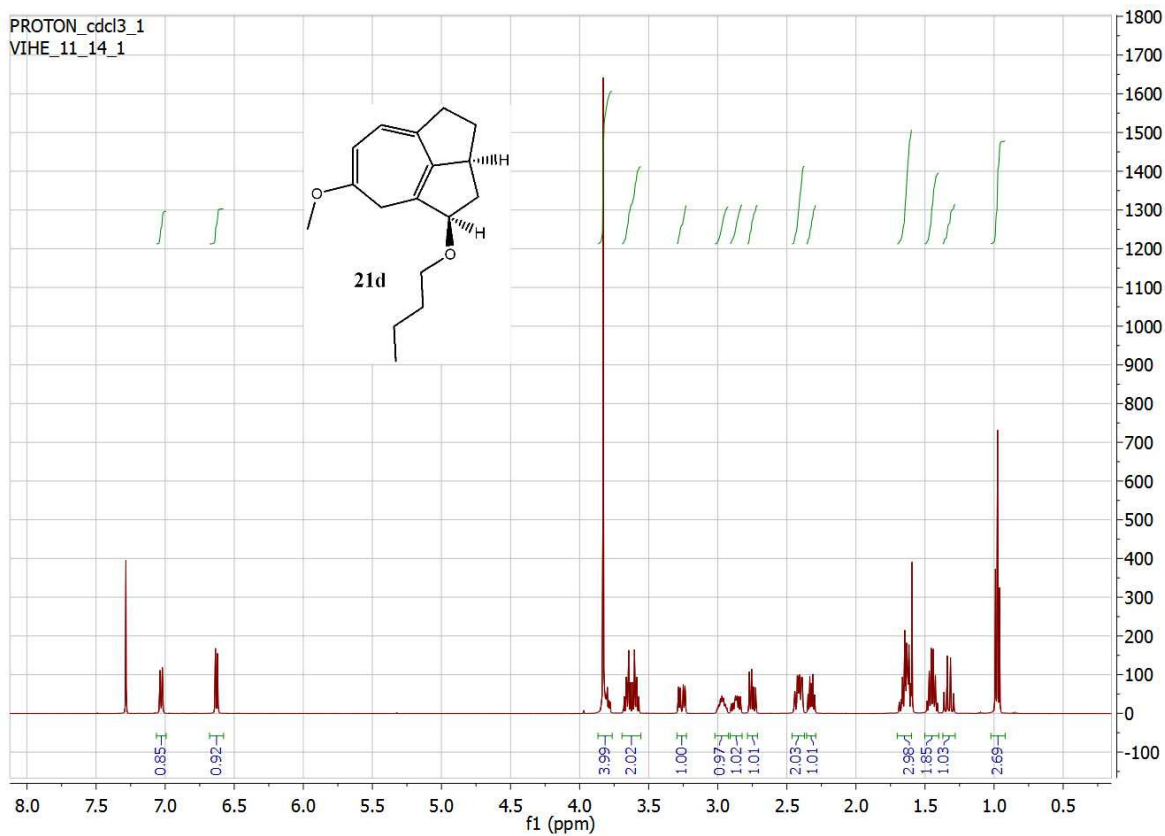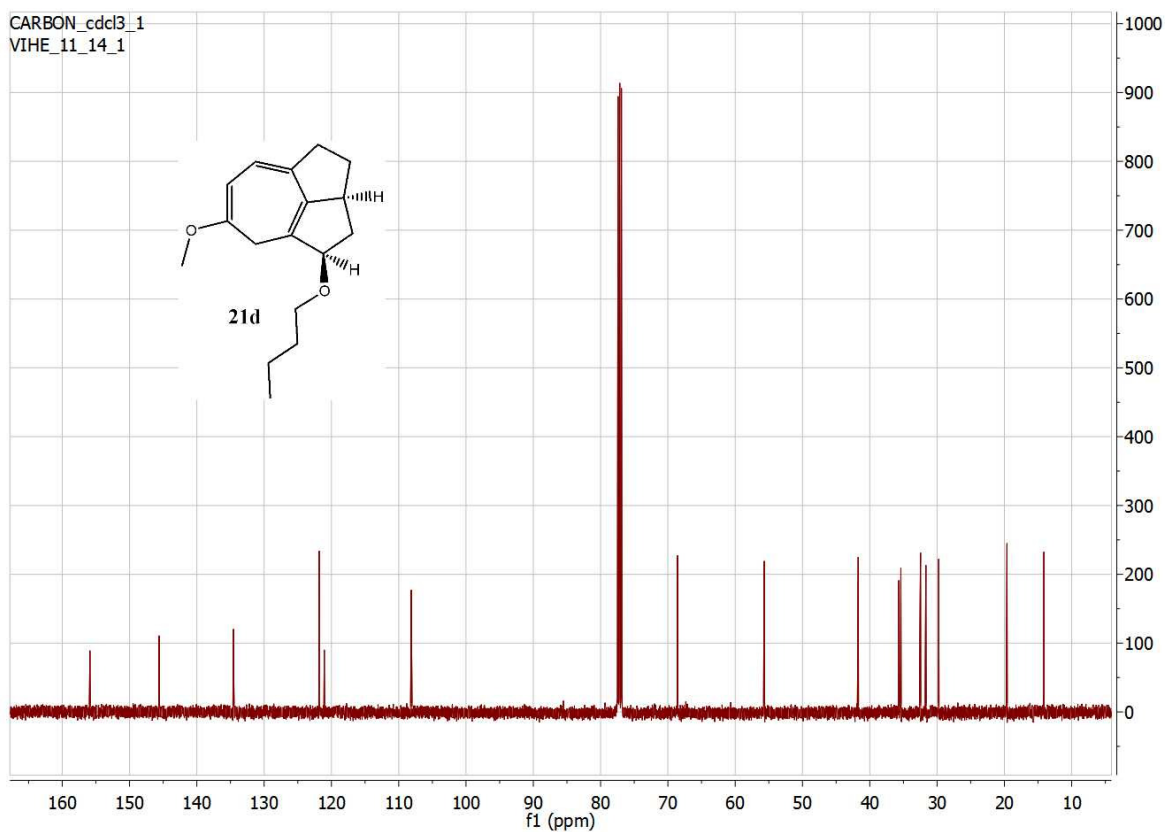

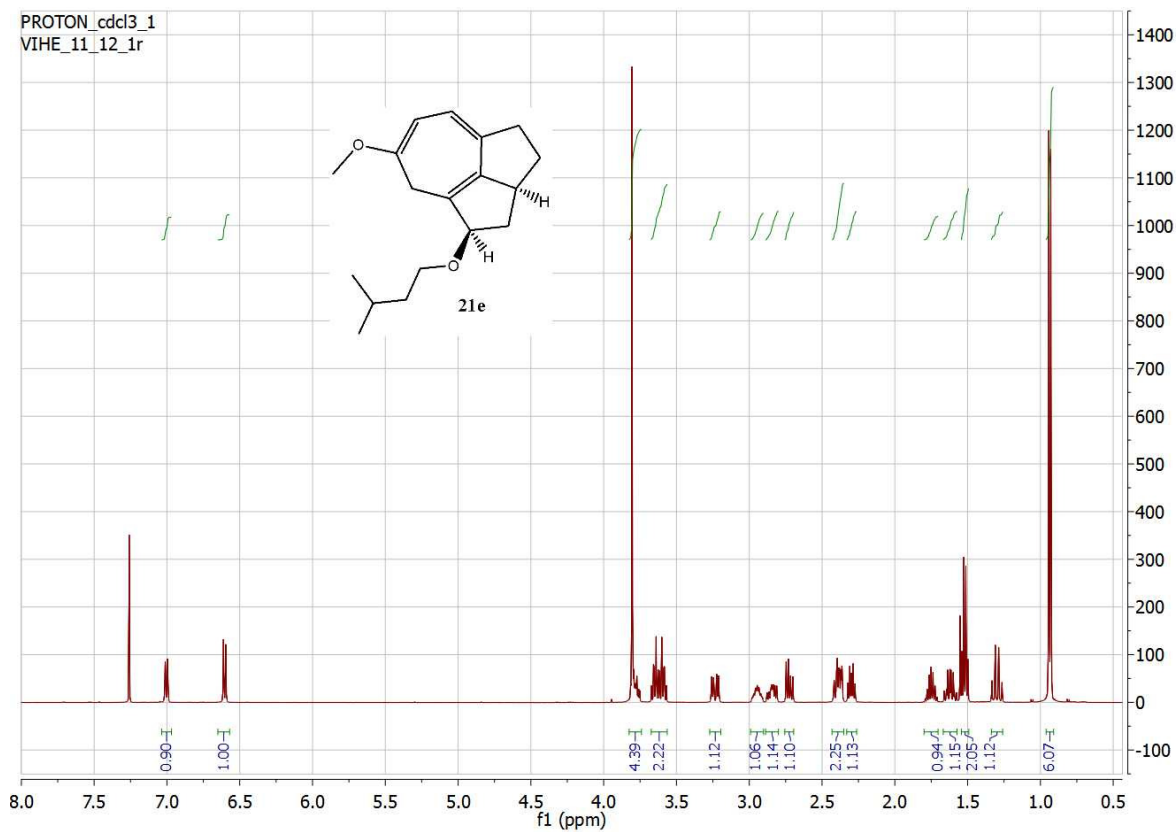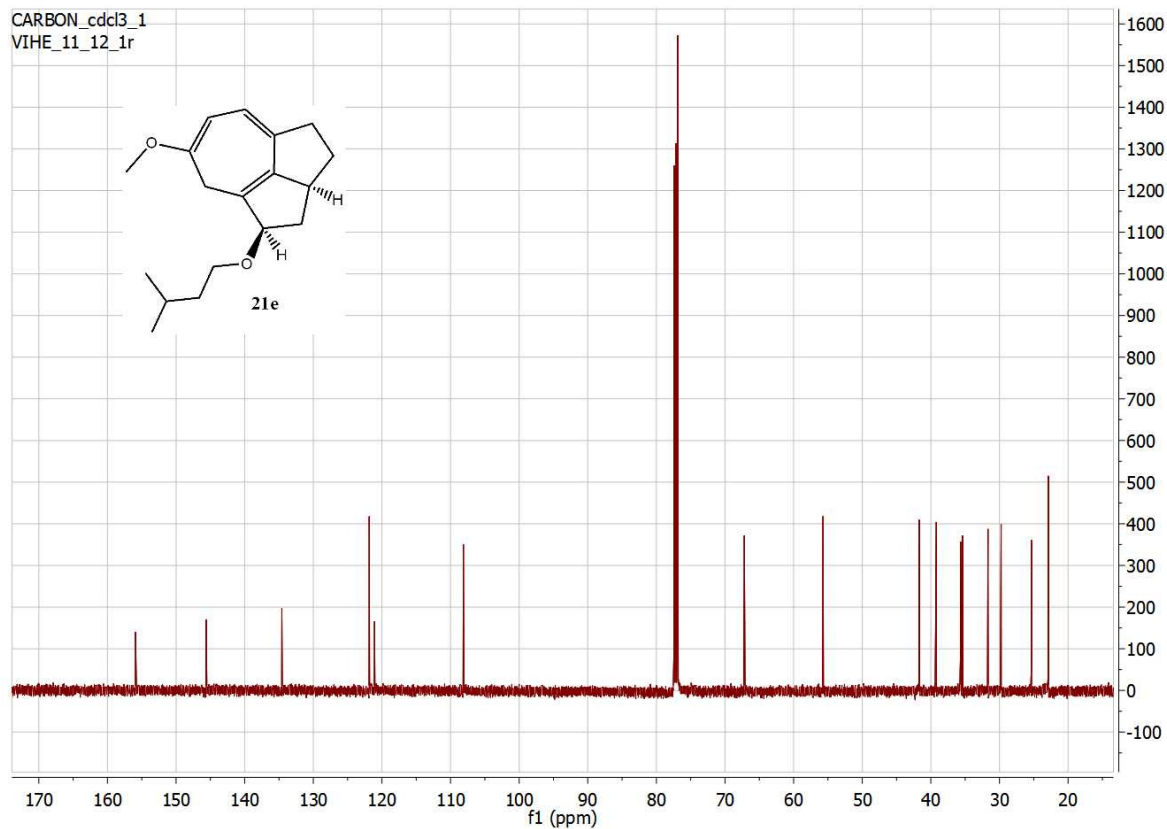

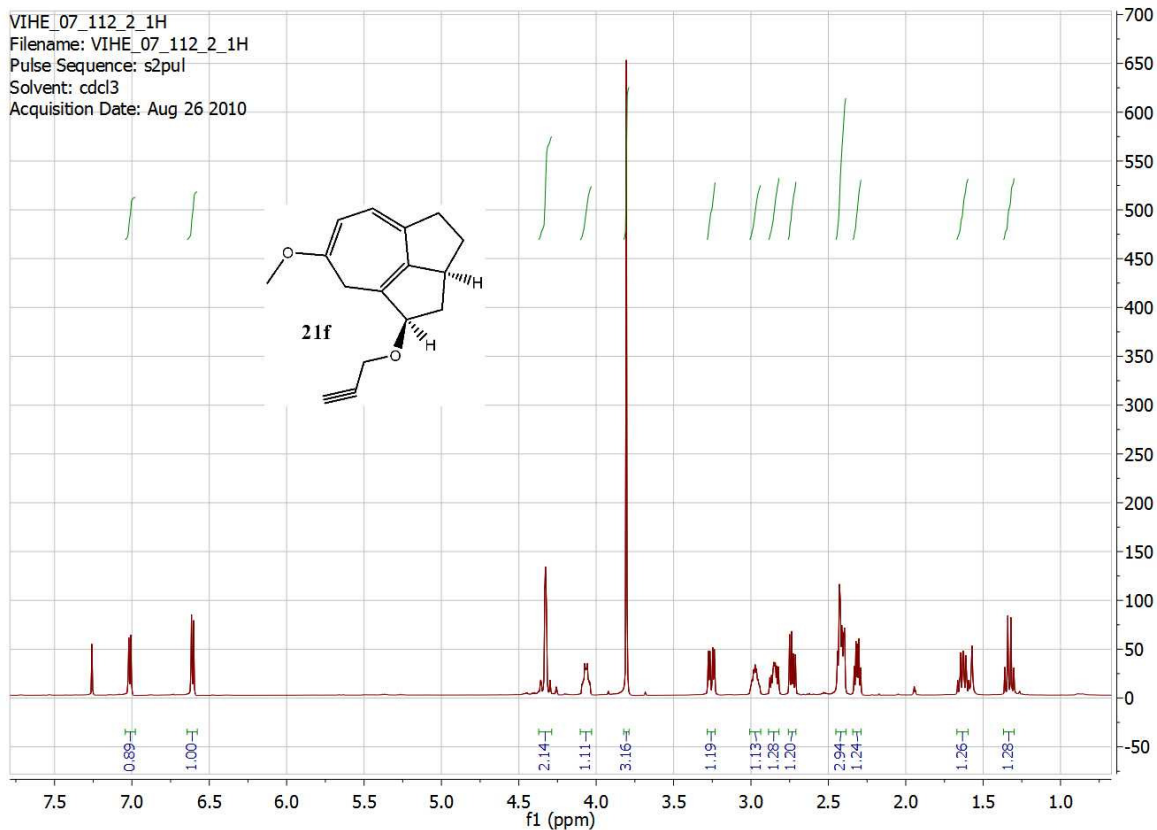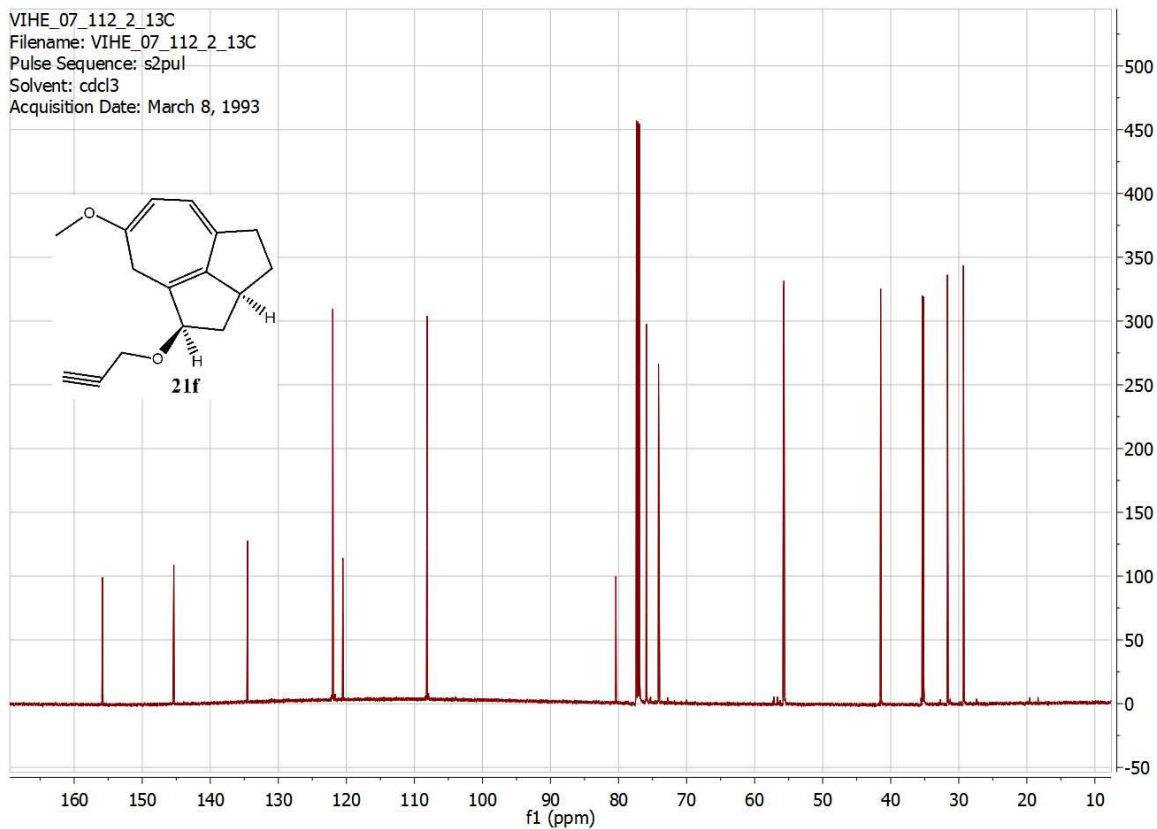

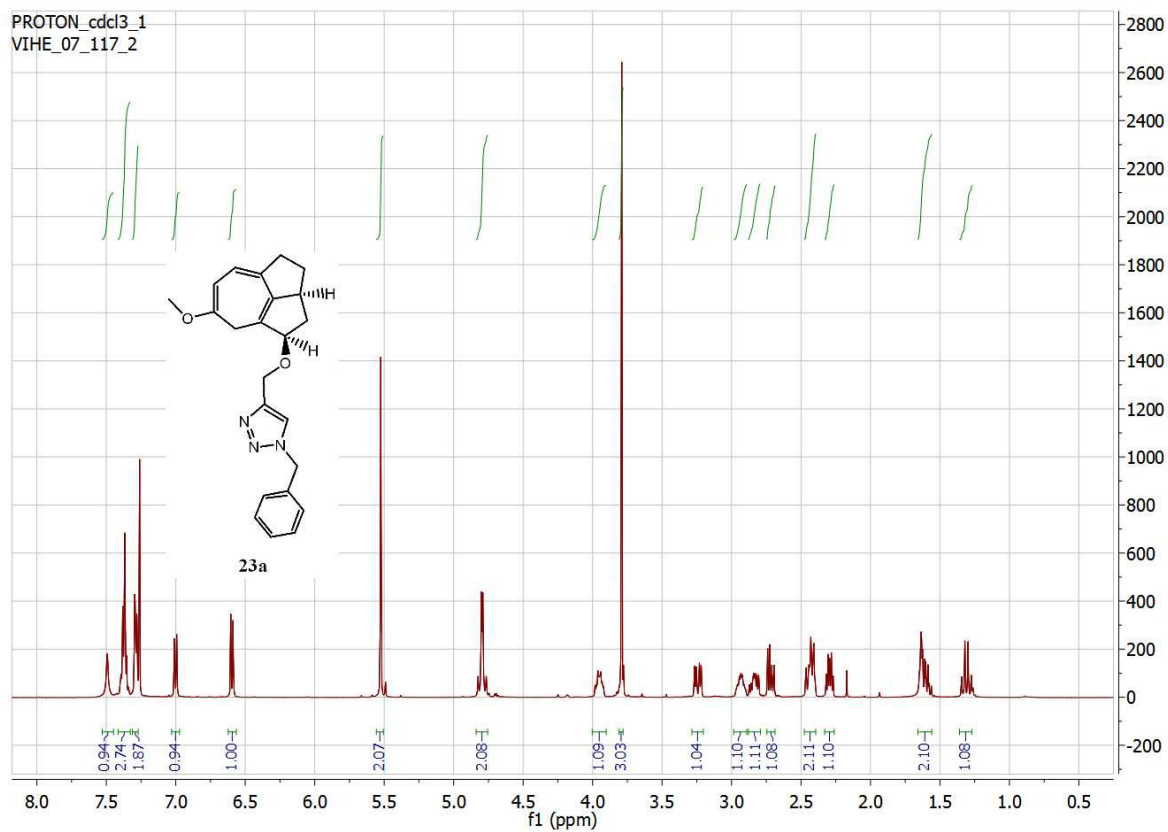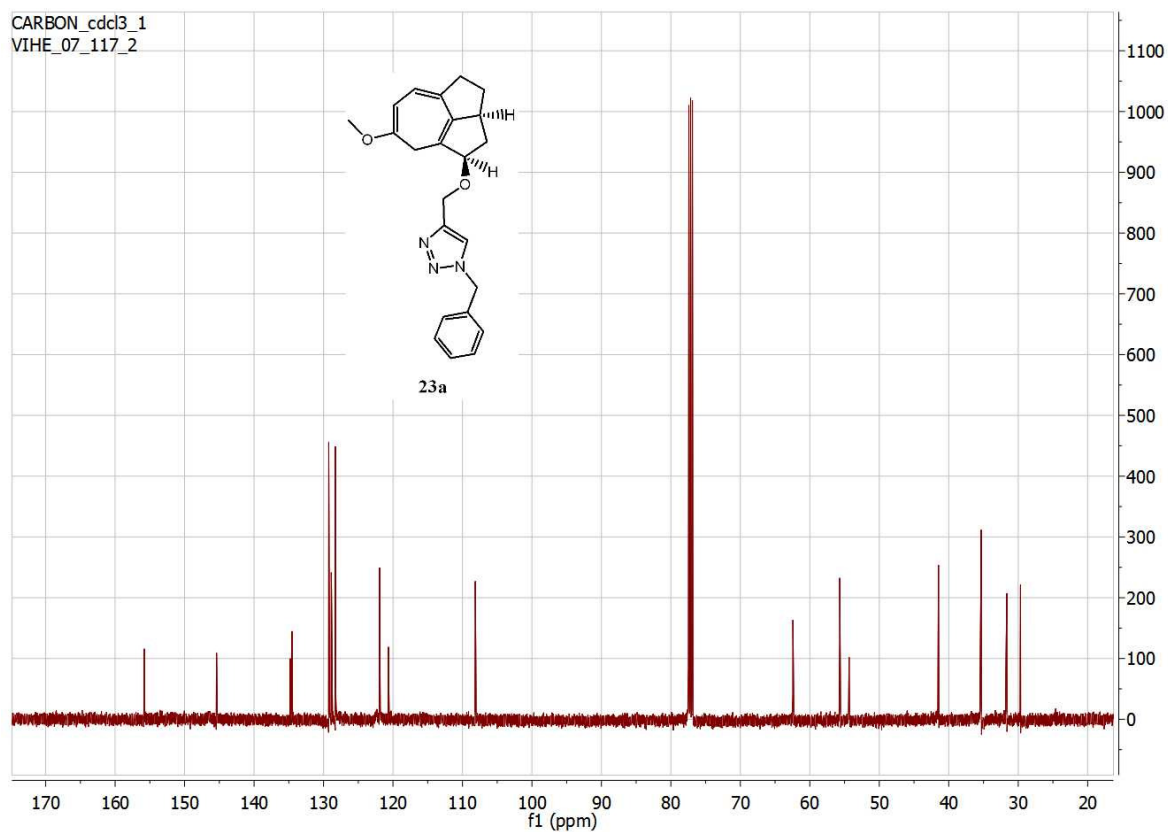

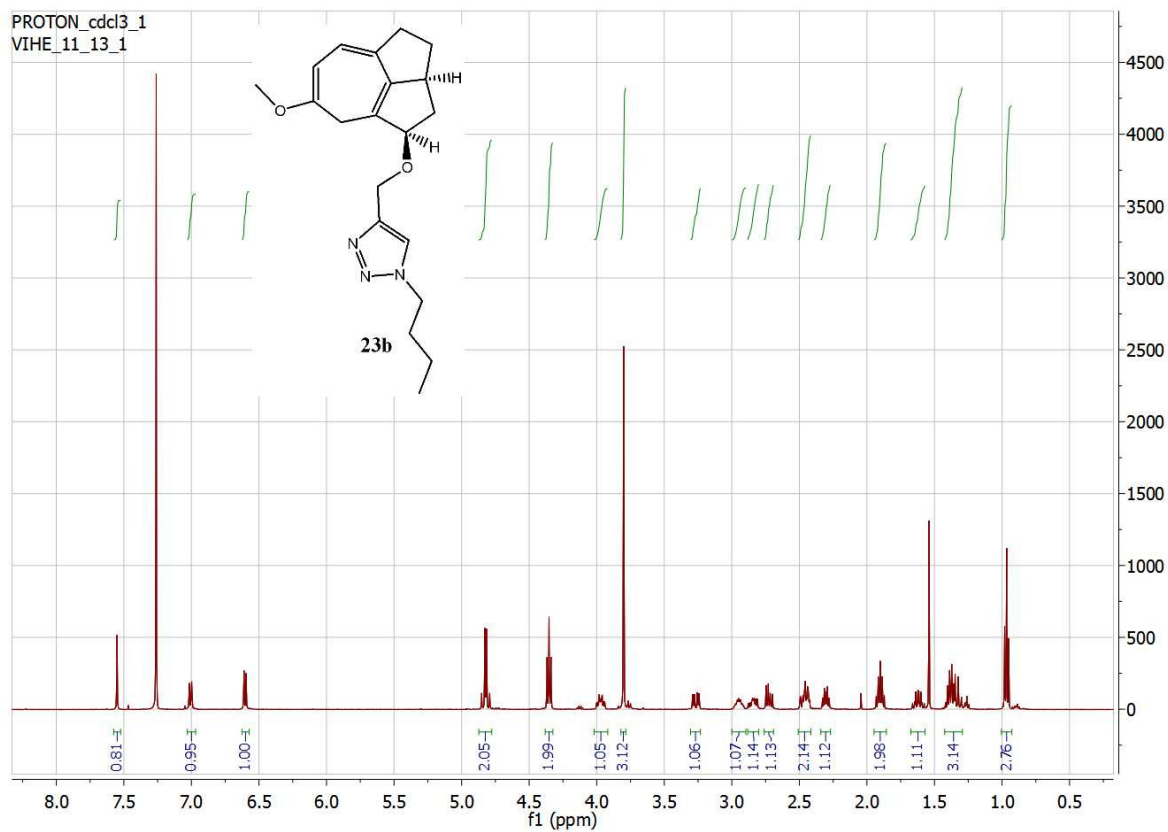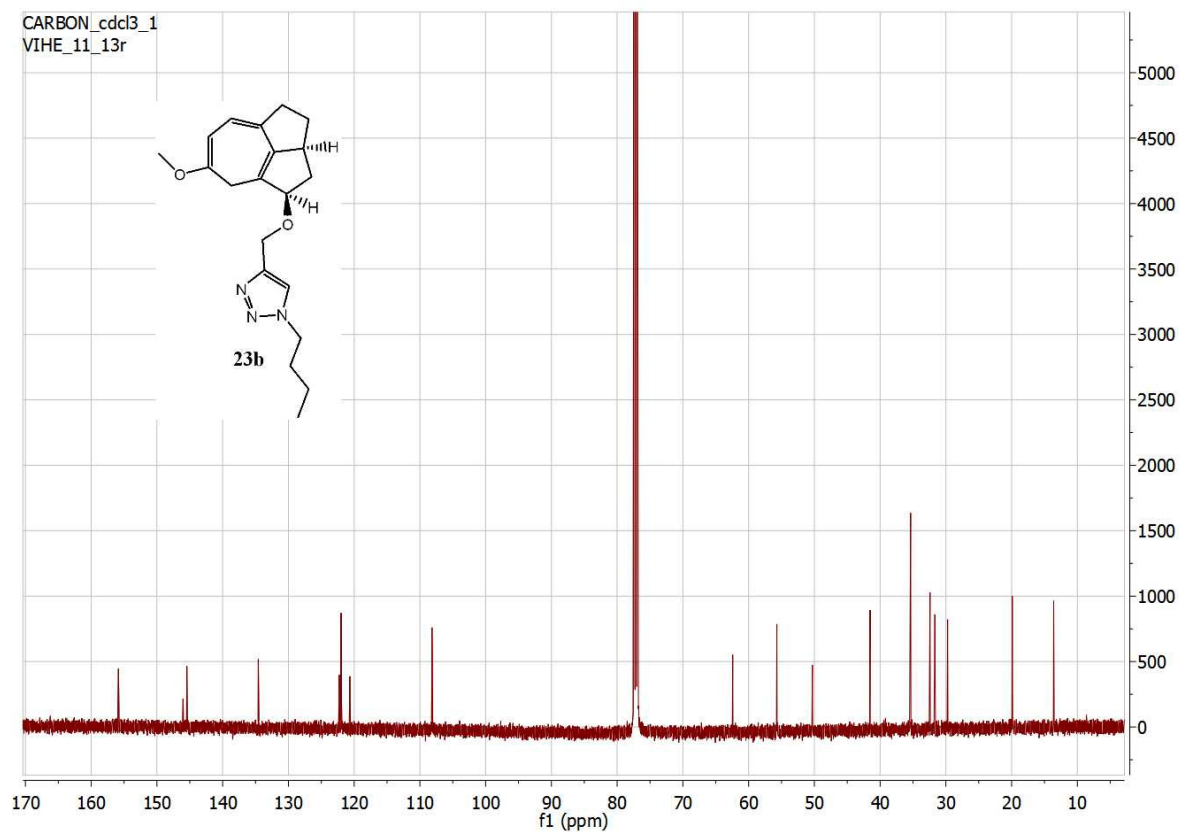

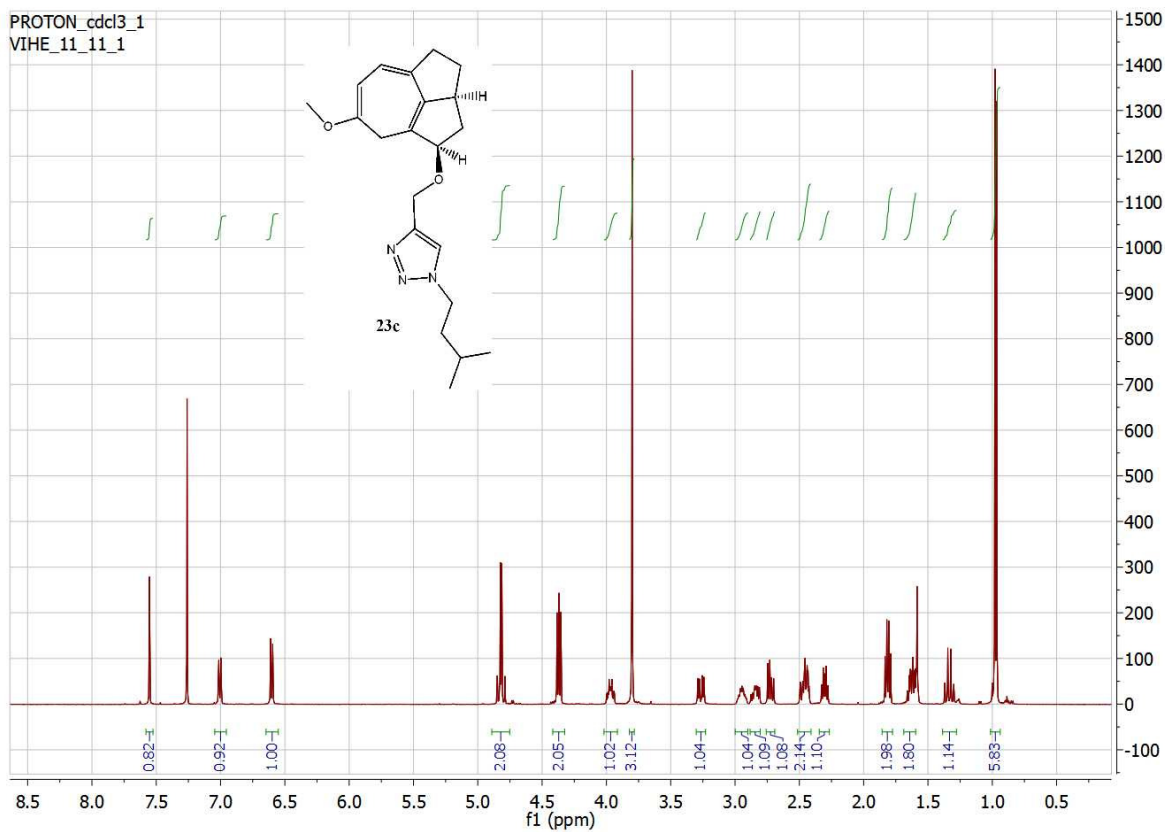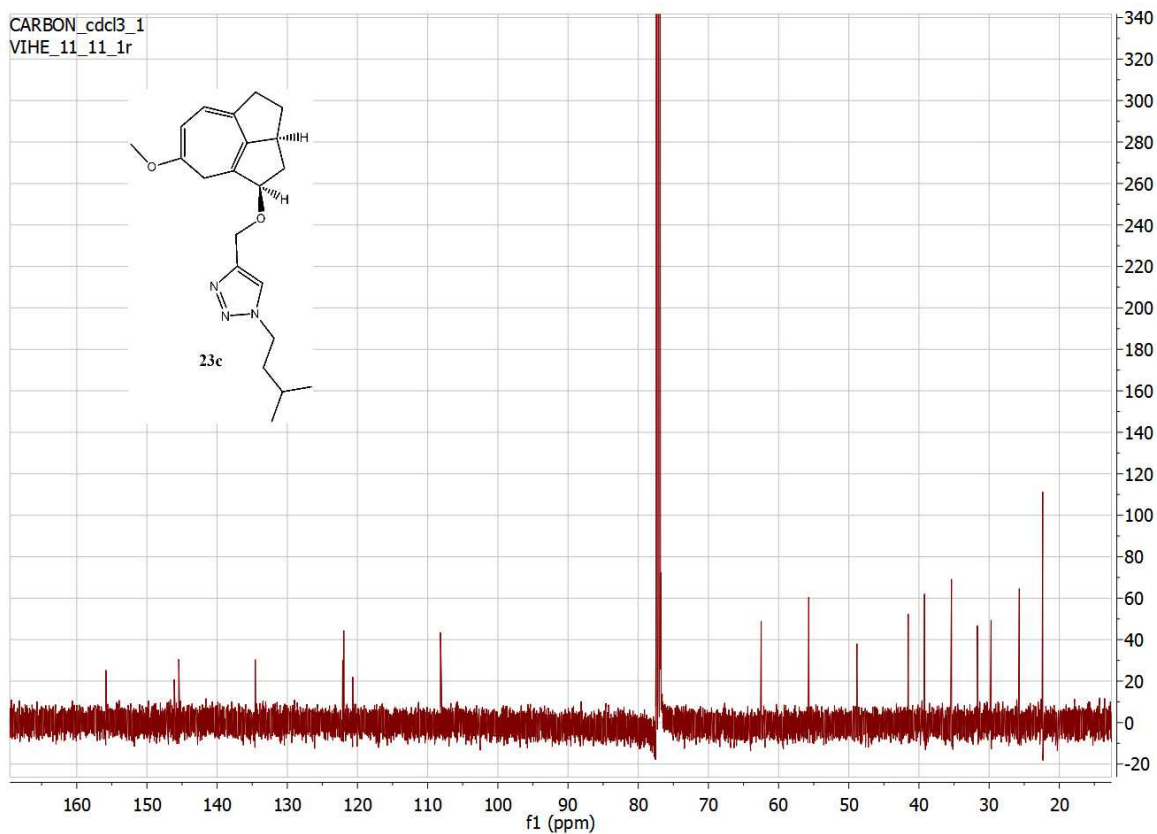

Supplement: c1ob05299c.pdf [file c1ob05299c.pdf]
